# Supplementary material for: Volume sweep imaging lung teleultrasound for detection of COVID-19 in Peru: a multicentre pilot study
Source: HighWire-hosted journal article supplement (doi:10.1136/bmjopen-2022-061332), 2022-10-01
Supplement: bmjopen-2022-061332supp003_data_supplement.pdf [file bmjopen-2022-061332supp003_data_supplement.pdf]

Supplemental Table 1. Baseline demographic characteristics of the population. Categorical variables are summarised throughout by proportions with 95% confidence intervals, while continuous variables are summarised as mean +/- standard deviation (range).

|                                       |                                    |                                 |
|---------------------------------------|------------------------------------|---------------------------------|
| Location                              | Ancash - Conchucos                 | 1.88% (0.514-4.74%,<br>n=4/213) |
|                                       | Ancash - Pampas                    | 25.8% (20.1-32.2%,<br>n=55/213) |
|                                       | Cerro de Pasco - San Juan de Milpo | 21.1% (15.8-27.2%,<br>n=45/213) |
|                                       | Cerro de Pasco - Tíclacayán        | 32.4% (26.2-39.1%,<br>n=69/213) |
|                                       | Ica - Chavín                       | 18.8% (13.8-24.7%,<br>n=40/213) |
| Sex                                   | Female                             | 69% (62.3-75.2%,<br>n=147/213)  |
|                                       | Male                               | 31% (24.8-37.7%,<br>n=66/213)   |
| Age (years)                           |                                    | 42.8+/-18.2 (0-92)              |
| Heart Rate (beats per minute)         |                                    | 72.1+/-9.31 (51-114)            |
| Respiratory Rate (breaths per minute) |                                    | 22.6+/-7 (16-40)                |
| Oxygen Saturation (%)                 |                                    | 94.2+/-3.52 (74-99)             |
| Temperature (°C)                      |                                    | 36.5+/-0.546 (35-39)            |

|                  |     |                                  |
|------------------|-----|----------------------------------|
| Symptoms Present | No  | 56.8% (49.9-63.6%,<br>n=121/213) |
|                  | Yes | 43.2% (36.4-50.1%,<br>n=92/213)  |
| Cough            | No  | 76.1% (69.7-81.6%,<br>n=162/213) |
|                  | Yes | 23.9% (18.4-30.3%,<br>n=51/213)  |
| Feeling Ill      | No  | 72.8% (66.3-78.6%,<br>n=155/213) |
|                  | Yes | 27.2% (21.4-33.7%,<br>n=58/213)  |
